# Supplementary material for: Dehydration of glucose/fructose to 5-hydroxymethylfurfural (5-HMF) over an easily recyclable sulfated titania (SO42−/TiO2) catalyst
Source: Royal Society of Chemistry journal article supplement (doi:10.1039/d0nj04151c), 2020-01-01
Supplement: d0nj04151c1.pdf [file d0nj04151c1.pdf]

## Supplementary Information

### Dehydration of glucose/fructose to 5-Hydroxymethylfurfural (5-HMF) over an easily recyclable sulfated titania ( $\text{SO}_4^{2-}/\text{TiO}_2$ ) catalyst

Richa Tomer and Prakash Biswas\*

Department of Chemical Engineering, Indian Institute of Technology Roorkee,  
Roorkee-247667, Uttarakhand, India

\*Corresponding Author: Tel.: (+91)-1332-28-5820; Fax: (+1)-1332-27-6535

E-mail: [prakash.biswas@ch.iitr.ac.in](mailto:prakash.biswas@ch.iitr.ac.in); [prakashbiswas@gmail.com](mailto:prakashbiswas@gmail.com)

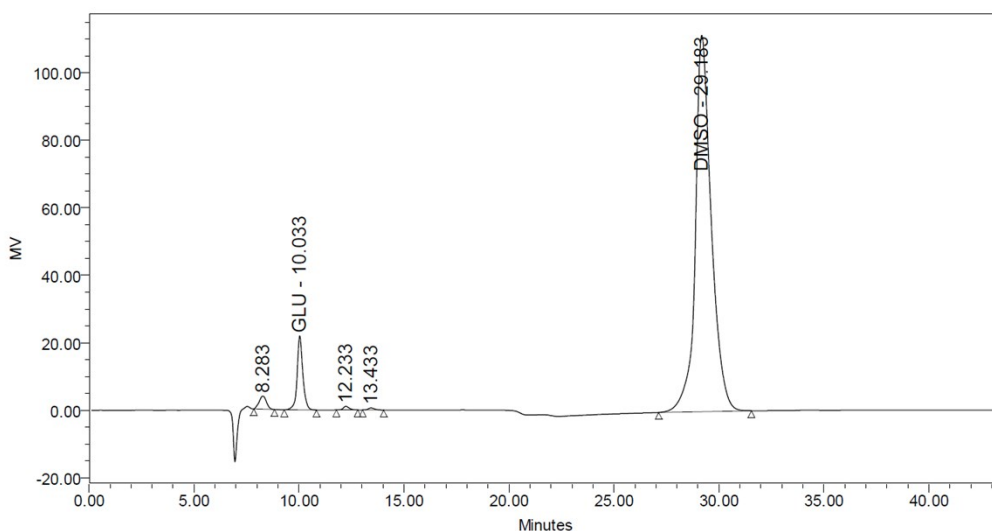

**Fig. S1** HPLC chromatogram of the blank run (in absence of catalyst). Unknown products detected at the retention time of 8.283, 12.233, 13.433 minutes, respectively,

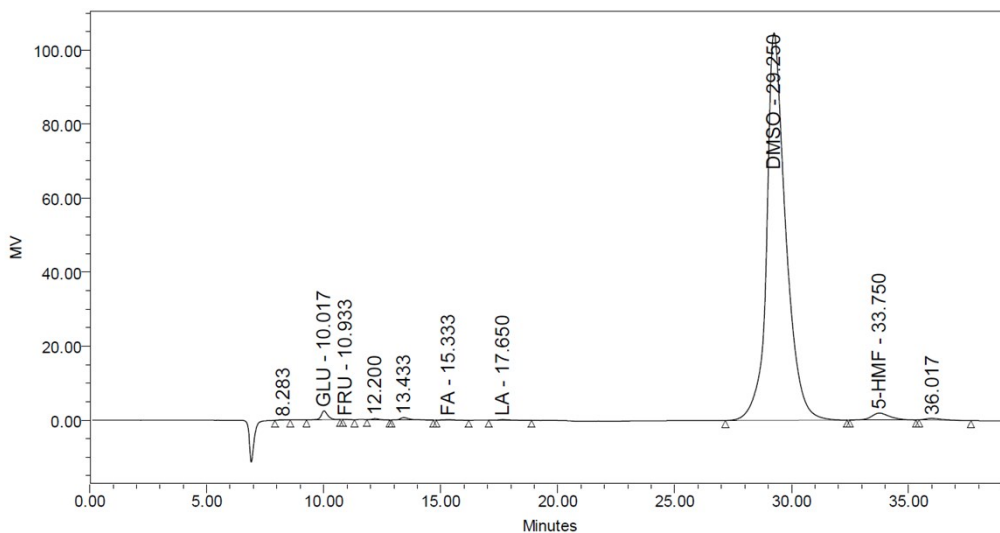

**Fig. S2** HPLC chromatogram of the reaction mixture in presence of 0.5 M  $\text{SO}_4^{2-}/\text{TiO}_2$  catalyst.

The main products detected and their retention time is as glucose at 10.017 min., fructose at 10.933 min., formic acid at 15.333 min, and levulinic acid at 17.650 min., 5-hydroxymethylfurfural at 33.750 min., respectively.

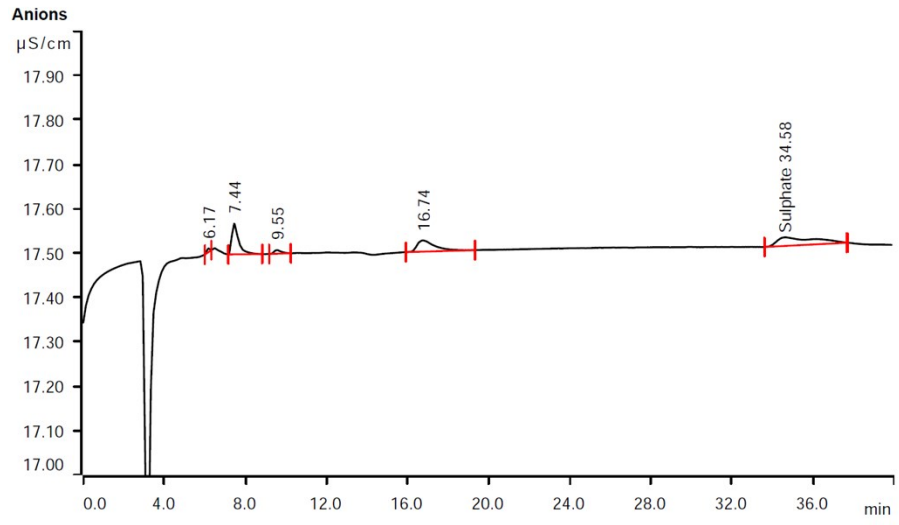

**Fig. S3** Ion chromatogram of retentate
